# Supplementary material for: Improved CRISPR/Cas9 gene editing by fluorescence activated cell sorting of green fluorescence protein tagged protoplasts
Source: PubMed Central journal article supplement (PMC6580576; doi:10.1186/s12896-019-0530-x), 2019-06-17

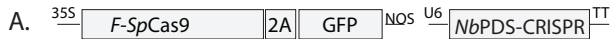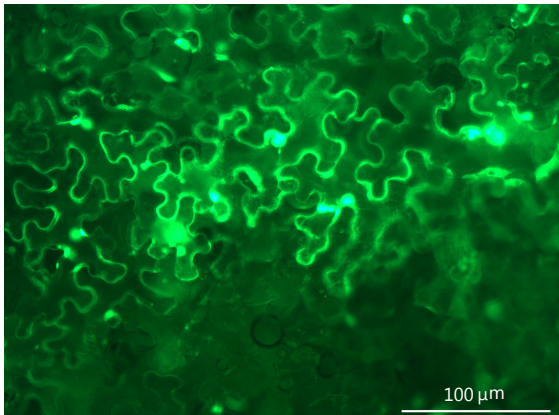

B.

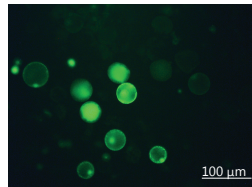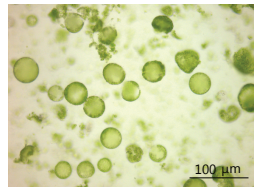

C.

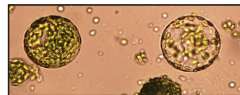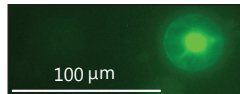

Supplement: 12896_2019_530_MOESM1_ESM.pdf [file 12896_2019_530_MOESM1_ESM.pdf]
